# Supplementary material
Source: HighWire-hosted journal article supplement (https://jech.bmj.com/content/74/12/1023)
Supplement: inline-supplementary-material-6 [file inline-supplementary-material-6.pdf]

Appendix 2: Characteristics of clinic non-attenders at 24 years.

| <b>Characteristics</b>                                                                   | <b>Attenders<br/>(n=3572)</b> | <b>Non-Attenders<br/>(n=5897)</b> | <b>Chi<sup>2</sup> result<br/>(p value)</b> |
|------------------------------------------------------------------------------------------|-------------------------------|-----------------------------------|---------------------------------------------|
| Sex (F, %)                                                                               | 2236 (62.6%)                  | 2644 (44.83%)                     | 279.8,<br>p<0.001                           |
| Social Status<br>(highest (%) and lowest<br>(%))                                         | 101 (2.8%), 611<br>(17.1%)    | 303 (5.1%), 527<br>(8.9%)         | 167.6,<br>p<0.001                           |
| Income<br>(highest (%) and lowest<br>(%))                                                | 788 (22%), 387<br>(10.8%)     | 755 (12.8%), 885<br>(15%)         | 148.5,<br>p<0.001                           |
| Maternal Education<br>(n (%) with more than O<br>level, n with less than O<br>level (%)) | 1620 (45.35), 555<br>(15.5%)  | 1648 (27.9%), 1604<br>(27.2%)     | 310.5,<br>p<0.001                           |
